# Supplementary material for: A survey of plant and algal genomes and transcriptomes reveals new insights into the evolution and function of the cellulose synthase superfamily
Source: PubMed Central journal article supplement (PMC4023592; doi:10.1186/1471-2164-15-260), 2014-04-04

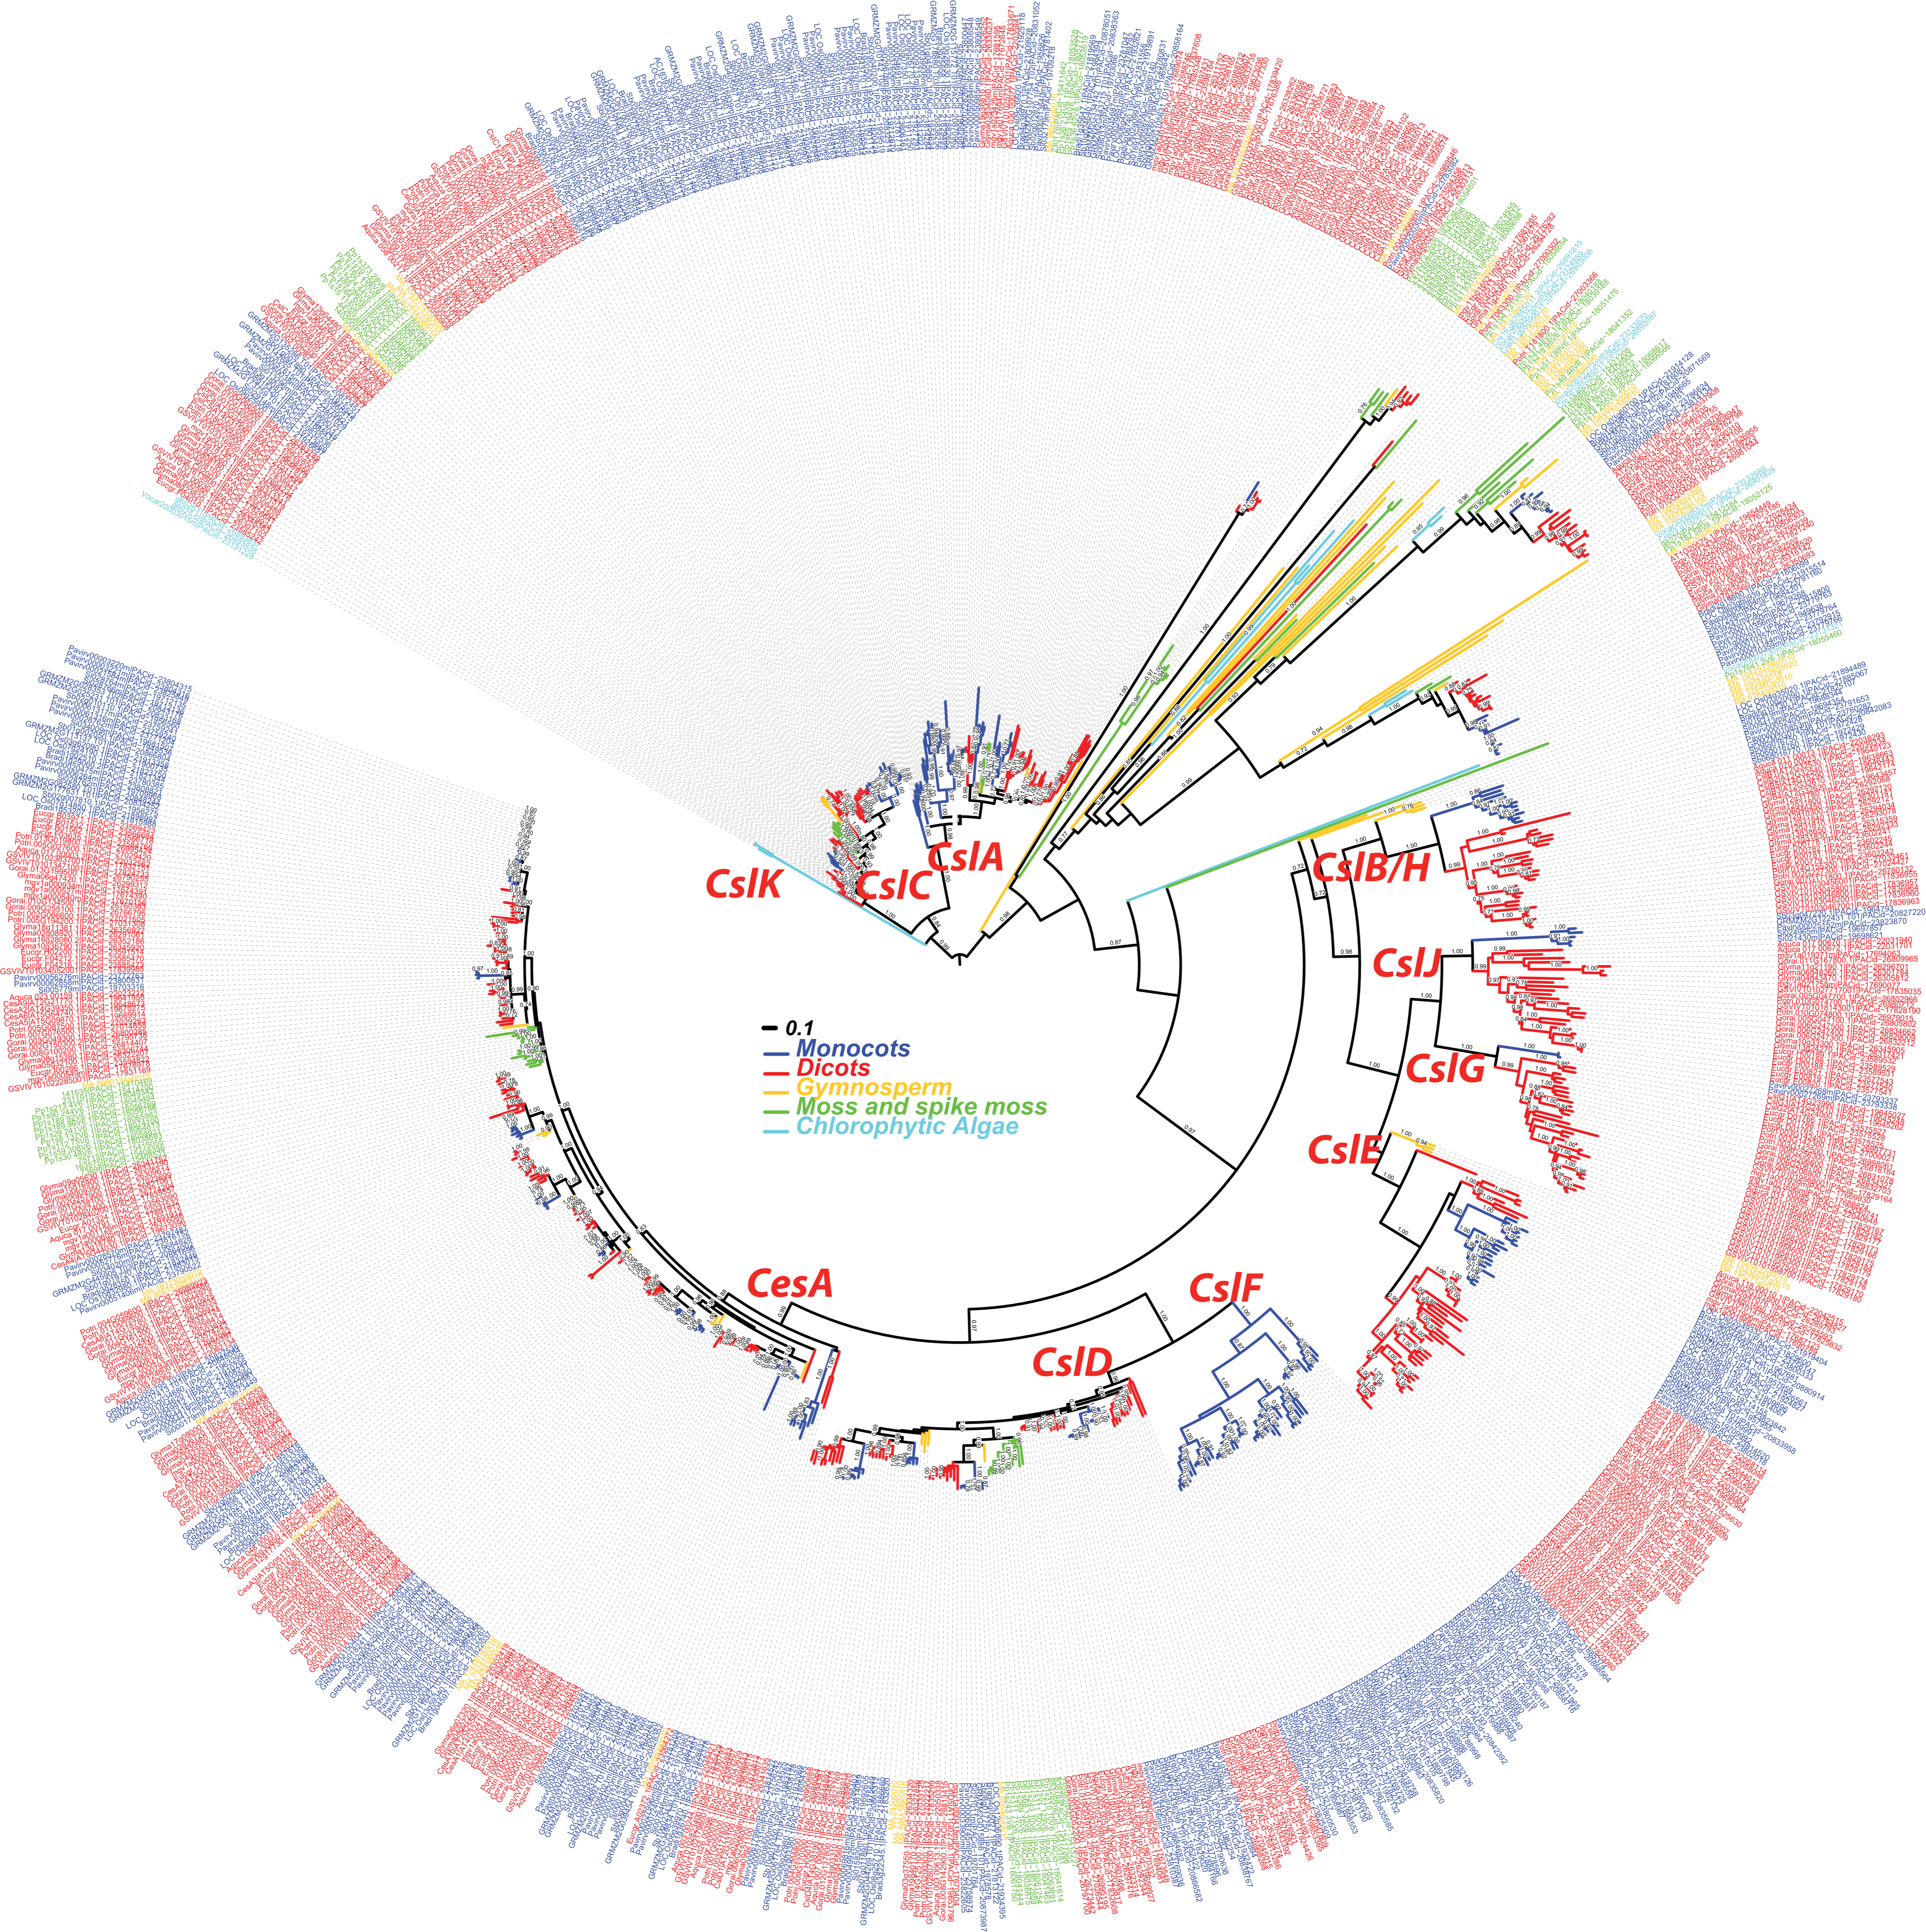

Supplement: 1471-2164-15-260-S2.pdf [file 1471-2164-15-260-S2.pdf]
