# Supplementary material for: A survey of plant and algal genomes and transcriptomes reveals new insights into the evolution and function of the cellulose synthase superfamily
Source: PubMed Central journal article supplement (PMC4023592; doi:10.1186/1471-2164-15-260), 2014-04-04

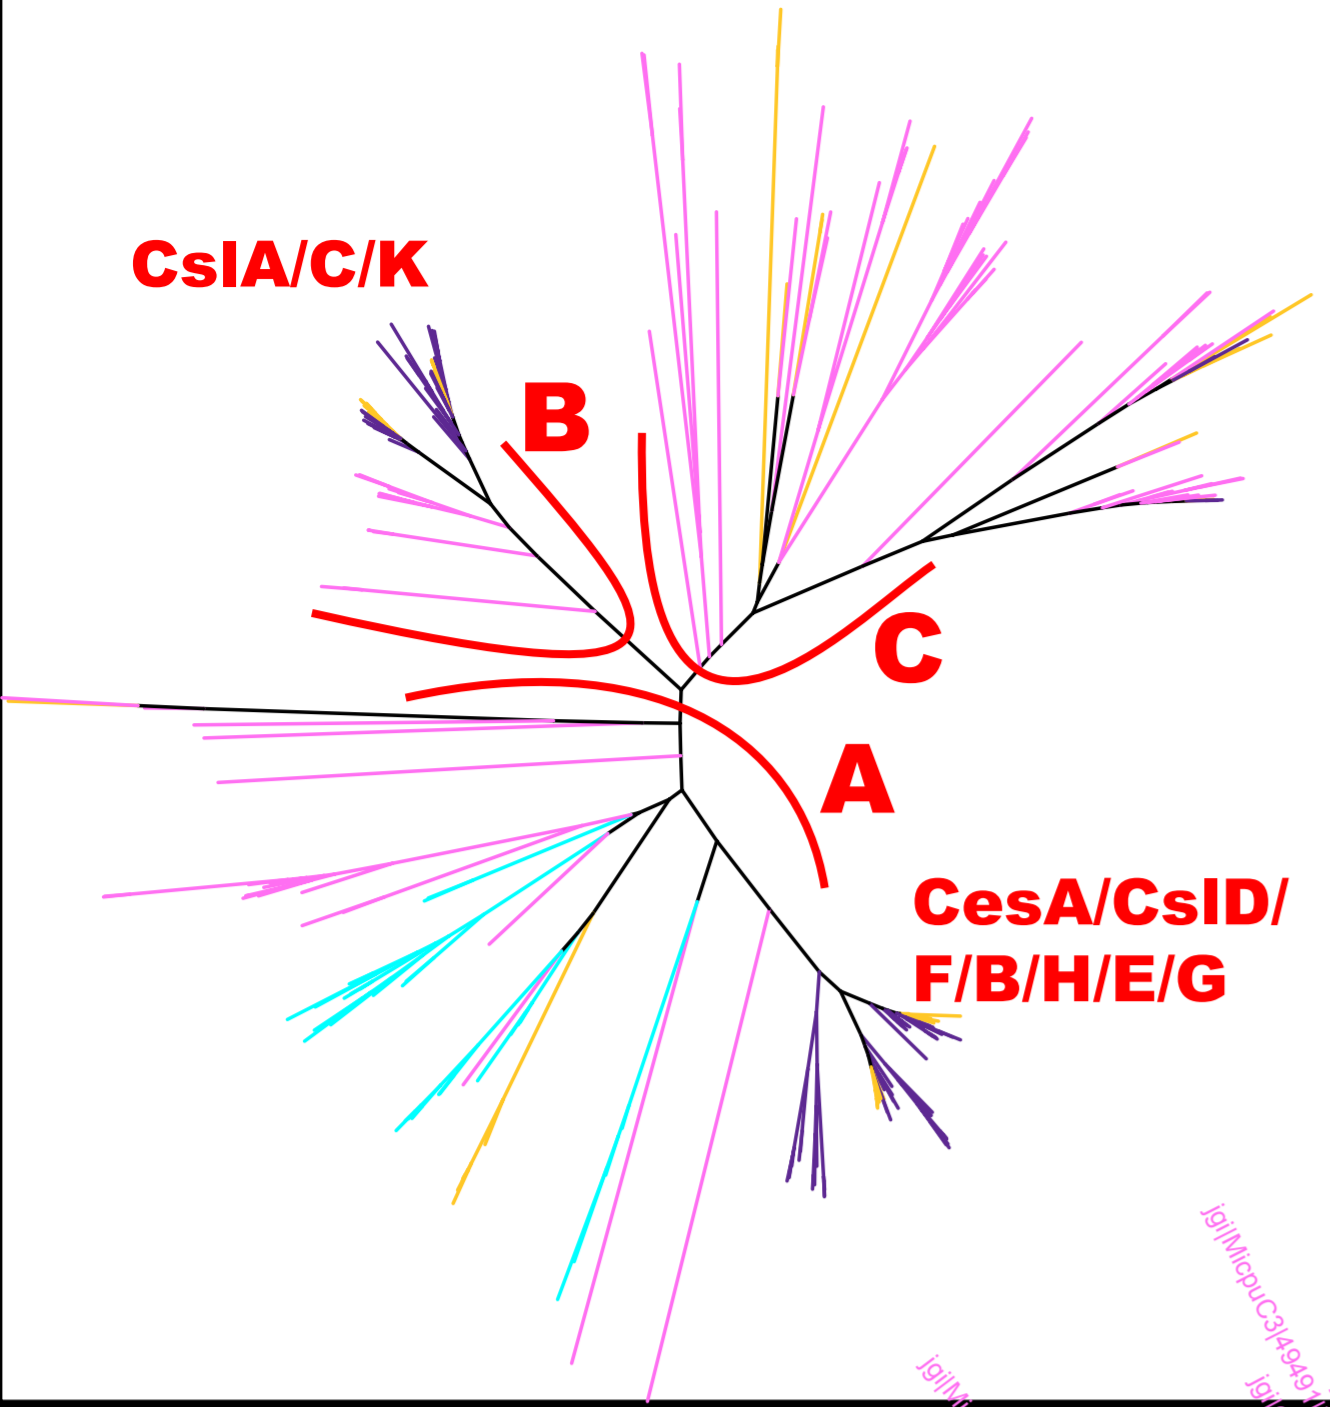

- 0.1
- Arabidopsis and Rice
- Moss and Spike Moss
- Chlorophytic Algae
- Proteins in Fig. 2 of Michel G et al. New Phytologist (2010) 188: 82–97

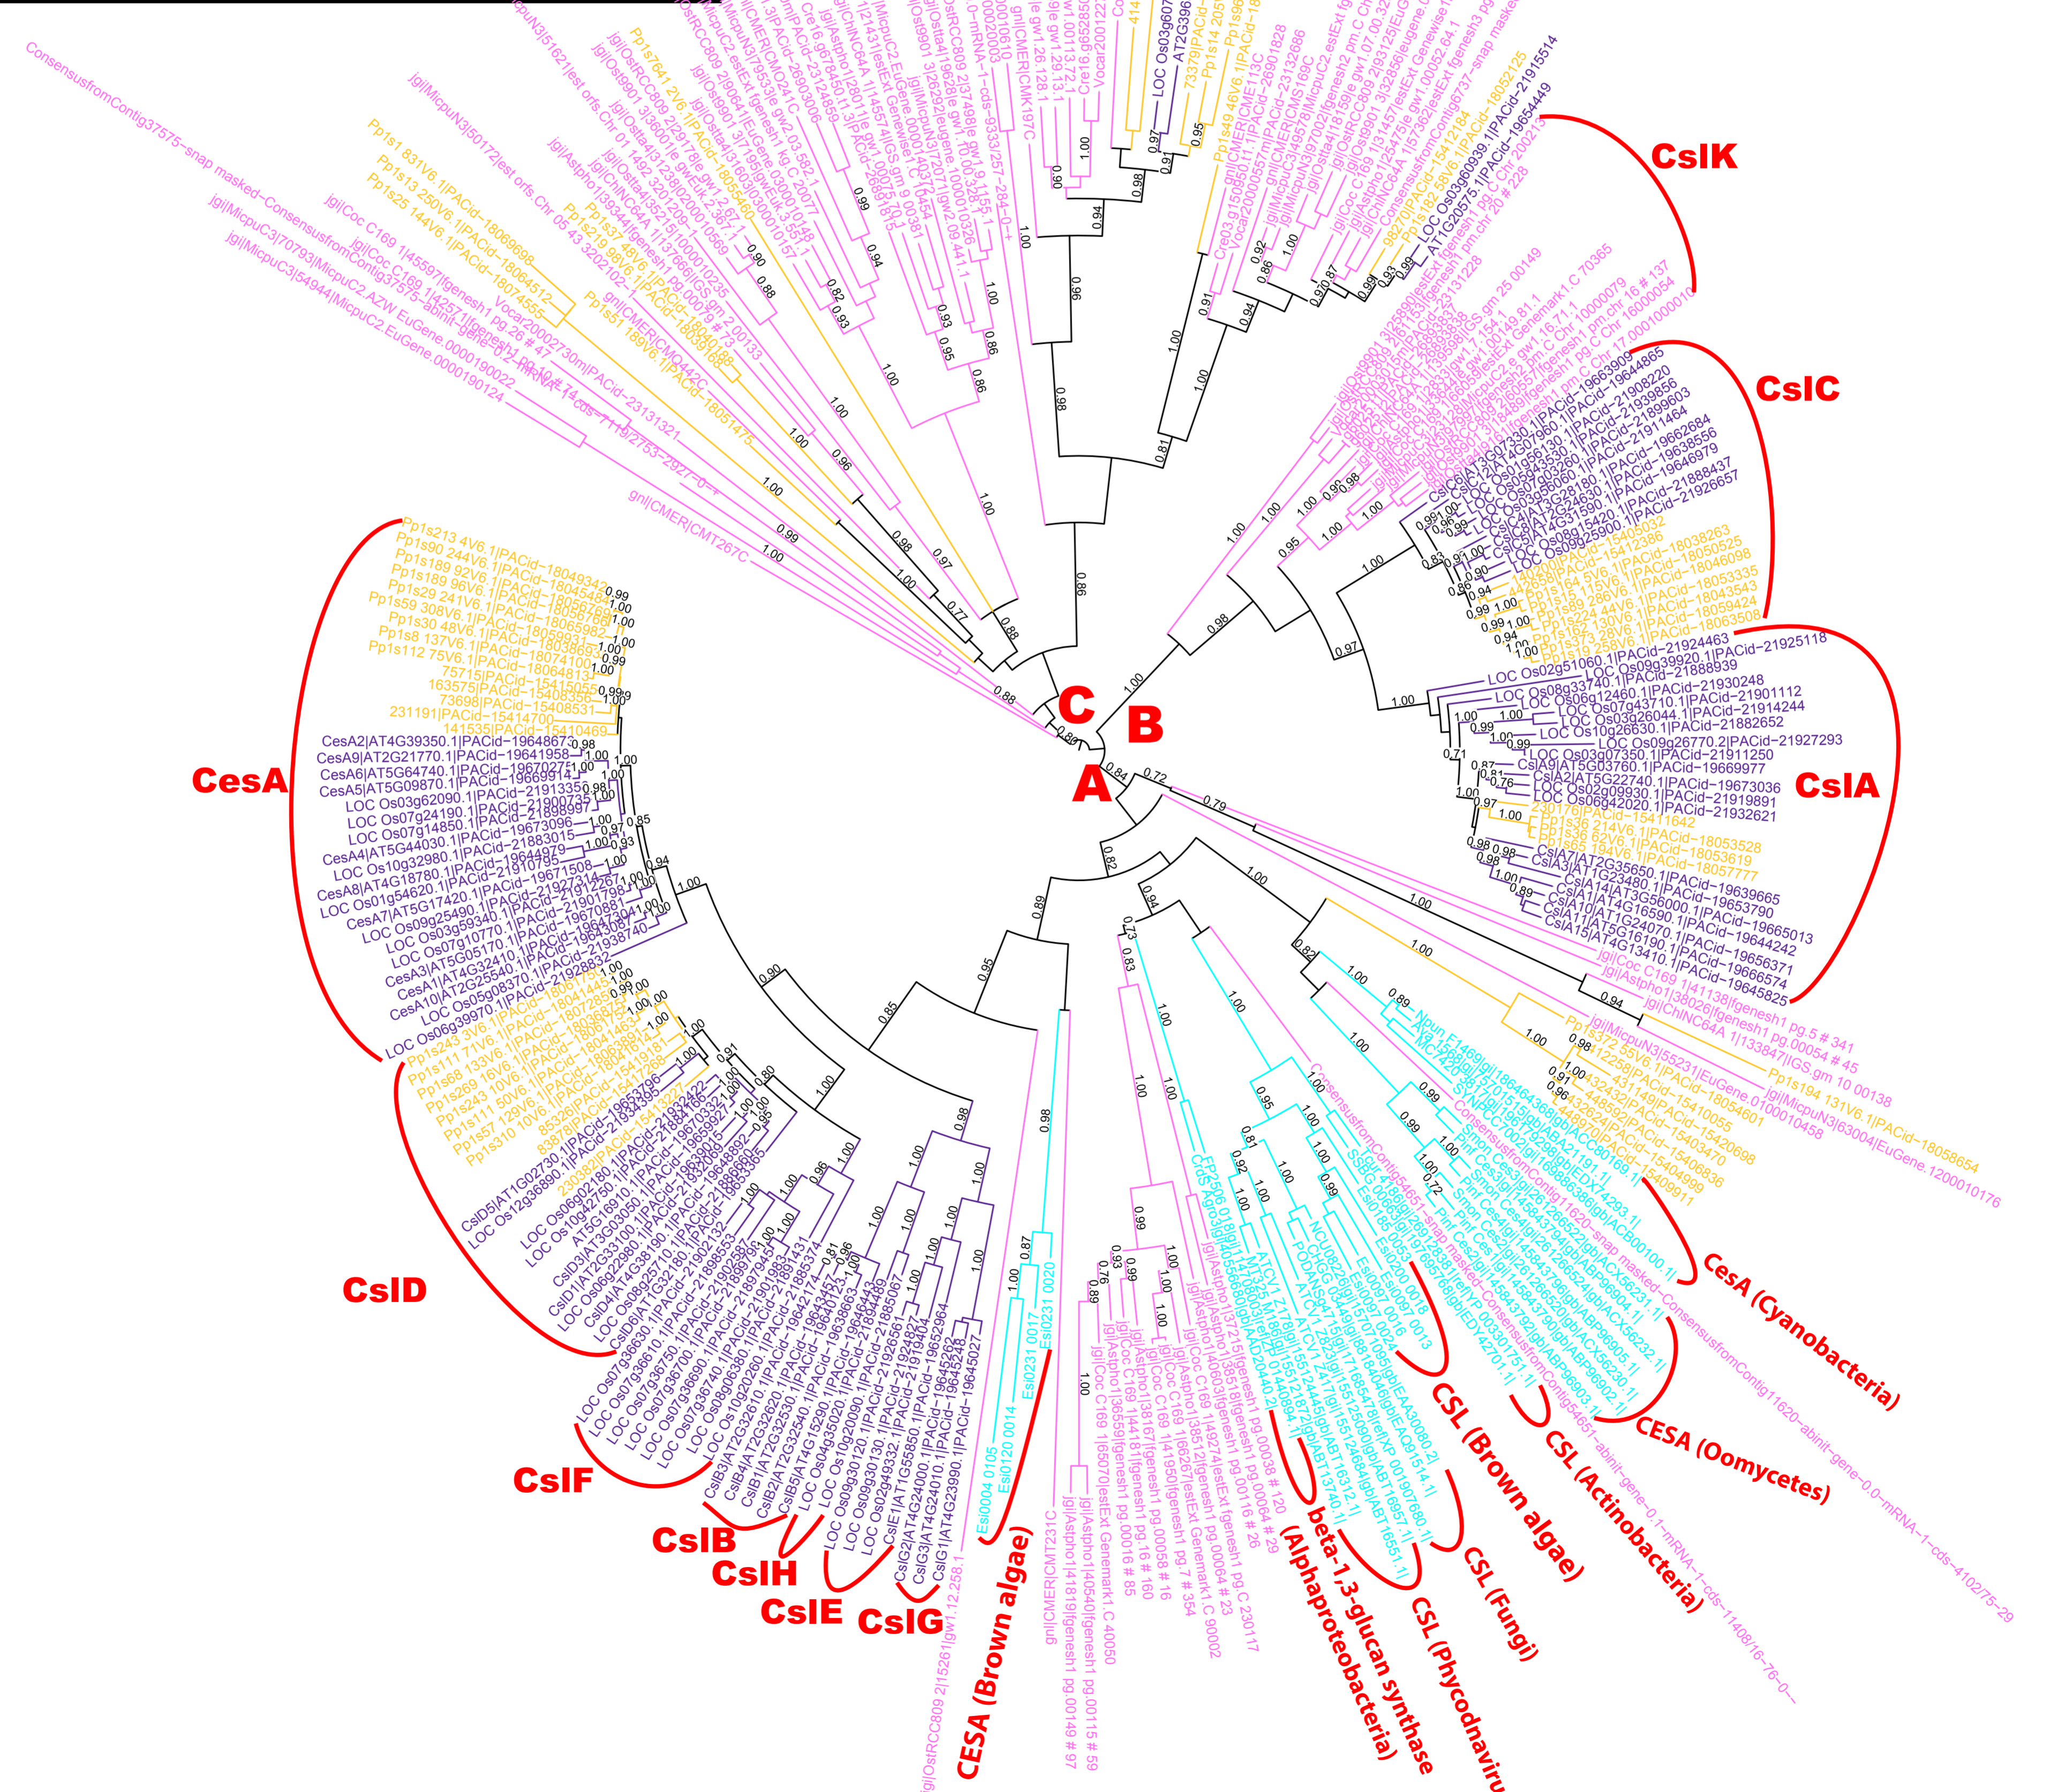

Supplement: 1471-2164-15-260-S5.pdf [file 1471-2164-15-260-S5.pdf]
